# Supplementary material for: Categorizing Active Marine Acoustic Sources Based on Their Potential to Affect Marine Animals
Source: MDPI journal article supplement (doi:10.3390/jmse10091278), 2022-09-09
Supplement: s1 [file s1]

**Supplementary Information for**

**Categorizing Active Marine Acoustic Sources Based on**

**Their Potential to Affect Marine Animals**

*C.D. Ruppel<sup>1</sup>, T.C. Weber<sup>2</sup>, E.R. Staaterman<sup>3</sup>, S.J. Labak<sup>3</sup>, and P.E. Hart<sup>4</sup>*

<sup>1</sup>U.S. Geological Survey, Woods Hole, Massachusetts

<sup>2</sup>Department of Mechanical Engineering, University of New Hampshire, Durham, New Hampshire

<sup>3</sup>Center for Marine Acoustics, Bureau of Ocean Energy Management, Sterling, Virginia

<sup>4</sup>U.S. Geological Survey, Santa Cruz, California

Corresponding Author: C. Ruppel ([cruppel@usgs.gov](mailto:cruppel@usgs.gov); 508-457-2339) ORCID: 0000-0003-2284-6632

**Table S1.** Maximum densities of cetacean and sea turtle species reported in available model grids, along with calculations for the threshold radius  $R_t$  using equation (4) in main text and assuming probability  $p=0.01$  (1% probability of taking a single animal) and random, uniform distribution of animals at the sea surface. The adjusted SL ( $SL_{it}$ ) is determined as outlined in the main text, using the appropriate Level B received SPL for cetaceans vs. turtles. 90<sup>th</sup> and 95<sup>th</sup> percentile calculated for species with high reported densities.

|                               | U.S. PACIFIC MARGIN (CA, OR, WA) <sup>a</sup>    |                                     |                             |                          |                          | NORTHERN GULF OF MEXICO <sup>b</sup>             |                        |                             |                          |                          | U.S. ATLANTIC MARGIN <sup>c</sup>                |                        |                             |                          |                          |
|-------------------------------|--------------------------------------------------|-------------------------------------|-----------------------------|--------------------------|--------------------------|--------------------------------------------------|------------------------|-----------------------------|--------------------------|--------------------------|--------------------------------------------------|------------------------|-----------------------------|--------------------------|--------------------------|
| Common Name                   | Max density <sup>d</sup> per 100 km <sup>2</sup> | $R_t$ (m) <sup>e</sup>              | $SL_{it}$ (dB) <sup>f</sup> | 90% density <sup>g</sup> | 99% density <sup>h</sup> | Max density <sup>d</sup> per 100 km <sup>2</sup> | $R_t$ (m) <sup>e</sup> | $SL_{it}$ (dB) <sup>f</sup> | 90% density <sup>g</sup> | 99% density <sup>h</sup> | Max density <sup>d</sup> per 100 km <sup>2</sup> | $R_t$ (m) <sup>e</sup> | $SL_{it}$ (dB) <sup>f</sup> | 90% density <sup>g</sup> | 99% density <sup>h</sup> |
| <i>Whales</i>                 |                                                  |                                     |                             |                          |                          |                                                  |                        |                             |                          |                          |                                                  |                        |                             |                          |                          |
| Baird's beaked whale          | 9.32                                             | 184.8                               | 205.3                       |                          |                          |                                                  |                        |                             |                          |                          |                                                  |                        |                             |                          |                          |
| Beaked whales                 |                                                  | Model results not used <sup>a</sup> |                             |                          |                          |                                                  | 4.68                   | 260.8                       | 208.3                    |                          | 56.8                                             | 74.9                   | 197.5                       | 3                        | 6                        |
| Blue whale                    | 1.17                                             | 521.6                               | 214.3                       |                          |                          |                                                  |                        |                             |                          |                          | 6.84                                             | 215.7                  | 206.7                       |                          |                          |
| Bryde's whale                 |                                                  |                                     |                             |                          |                          | 0.578                                            | 742.1                  | 217.4                       |                          |                          | 6.84                                             | 215.7                  | 206.7                       |                          |                          |
| False killer whale            |                                                  |                                     |                             |                          |                          | 0.748                                            | 652.3                  | 216.3                       |                          |                          | 0.008                                            | 6308                   | 236.0                       |                          |                          |
| Fin whale                     | 8.2                                              | 197.0                               | 205.9                       | 2.65                     | 4.5                      | 0.001                                            | 17841                  | 245.0                       |                          |                          | 7.61                                             | 204.5                  | 206.2                       |                          |                          |
| Humpback whale                | 19.4                                             | 128.1                               | 202.2                       |                          |                          |                                                  |                        |                             |                          |                          | 8.55                                             | 192.9                  | 205.7                       |                          |                          |
| Killer whale                  | Present in area, but not in database             |                                     |                             |                          |                          | 0.101                                            | 1775                   | 225.0                       |                          |                          | 0.009                                            | 5947                   | 235.5                       |                          |                          |
| Kogia whale                   |                                                  |                                     |                             |                          |                          | 2.56                                             | 352.6                  | 210.9                       |                          |                          | 0.094                                            | 1840                   | 225.3                       |                          |                          |
| Melon headed whale            |                                                  |                                     |                             |                          |                          | 4.61                                             | 262.8                  | 208.4                       |                          |                          | 0.241                                            | 1149                   | 221.2                       |                          |                          |
| Minke whale                   | 0.491                                            | 805.2                               | 218.1                       |                          |                          |                                                  |                        |                             |                          |                          | 3.62                                             | 296.5                  | 209.4                       |                          |                          |
| North Pacific Right Whale     | Present in area, but not in database             |                                     |                             |                          |                          |                                                  |                        |                             |                          |                          |                                                  |                        |                             |                          |                          |
| North Atlantic Right Whale    |                                                  |                                     |                             |                          |                          |                                                  |                        |                             |                          |                          | 5.58                                             | 238.8                  | 207.6                       |                          |                          |
| Northern bottlenose whale     |                                                  |                                     |                             |                          |                          |                                                  |                        |                             |                          |                          | 0.041                                            | 2786                   | 228.9                       |                          |                          |
| Pilot whales                  |                                                  |                                     |                             |                          |                          | 6                                                | 230.3                  | 207.2                       |                          |                          | 31.2                                             | 101.0                  | 200.1                       |                          |                          |
| Pygmy killer whale            |                                                  |                                     |                             |                          |                          | 0.691                                            | 678.7                  | 216.6                       |                          |                          |                                                  |                        |                             |                          |                          |
| Sei whale                     |                                                  |                                     |                             |                          |                          |                                                  |                        |                             |                          |                          | 2.39                                             | 364.9                  | 211.2                       |                          |                          |
| Sperm whale                   | Model results not used <sup>a</sup>              |                                     |                             |                          |                          | 2.05                                             | 394.0                  | 211.9                       |                          |                          | 5.86                                             | 233.1                  | 207.3                       |                          |                          |
| <i>Dolphins and Porpoises</i> |                                                  |                                     |                             |                          |                          |                                                  |                        |                             |                          |                          |                                                  |                        |                             |                          |                          |
| Atlantic white sided dolphin  |                                                  |                                     |                             |                          |                          |                                                  |                        |                             |                          |                          | 62.2                                             | 71.5                   | 197.1                       | 12                       | 24                       |
| Atlantic spotted dolphin      |                                                  |                                     |                             |                          |                          | 65.9                                             | 69.5                   | 196.8                       | 24                       | 35                       | 75.15                                            | 65.1                   | 196.3                       | 18                       | 26                       |
| Bottlenose dolphin            | 154                                              | 45.5                                | 193.2                       | 1                        | 2                        | 143                                              | 47.2                   | 193.5                       | 55                       | 96                       | 2486                                             | 11.3                   | 181.1                       | 15                       | 30                       |
| Clymene dolphin               |                                                  |                                     |                             |                          |                          | 16.3                                             | 139.7                  | 202.9                       |                          |                          | 2.53                                             | 354.7                  | 211.0                       |                          |                          |
| Dall's porpoise               | 17.6                                             | 134.5                               | 202.6                       |                          |                          |                                                  |                        |                             |                          |                          |                                                  |                        |                             |                          |                          |
| Fraser's dolphin              |                                                  |                                     |                             |                          |                          | 0.389                                            | 904.6                  | 219.1                       |                          |                          | 0.104                                            | 1750                   | 224.9                       |                          |                          |
| Harbor porpoise               |                                                  |                                     |                             |                          |                          |                                                  |                        |                             |                          |                          | 594.7                                            | 23.1                   | 187.3                       | 5                        | 13                       |

Supplementary Information for: Ruppel et al., Categorizing Active Marine Acoustic Sources Based on Their Potential to Affect Marine Animals.

|                                 |      |       |       |     |     |      |       |       |    |    |       |       |       |          |
|---------------------------------|------|-------|-------|-----|-----|------|-------|-------|----|----|-------|-------|-------|----------|
| Long beaked dolphin             | 476  | 25.9  | 188.3 | 1.4 | 150 |      |       |       |    |    |       |       |       |          |
| Northern right whale dolphin    | 307  | 32.2  | 190.2 | 7.5 | 60  |      |       |       |    |    |       |       |       |          |
| Pacific white dolphin           | 62.2 | 71.5  | 197.1 | 10  | 20  |      |       |       |    |    |       |       |       |          |
| Pantropical spotted dolphin     |      |       |       |     |     | 88.5 | 60.0  | 195.6 | 31 | 35 | 0.61  | 722.4 | 217.2 |          |
| Risso's dolphin                 | 22.4 | 119.2 | 201.5 |     |     | 10.2 | 176.7 | 204.9 |    |    | 57.2  | 74.6  | 197.5 | 3 7      |
| Rough toothed dolphin           |      |       |       |     |     | 1.93 | 406.2 | 212.2 |    |    | 0.069 | 2148  | 226.6 |          |
| Short beaked dolphin            | 295  | 32.8  | 190.3 | 125 | 214 |      |       |       |    |    | 298   | 32.7  | 190.3 | 12.5 100 |
| Small beaked dolphin            | 1.03 | 555.9 | 214.9 |     |     |      |       |       |    |    |       |       |       |          |
| Spinner dolphin                 |      |       |       |     |     | 146  | 46.7  | 193.4 | 3  | 34 | 0.04  | 2821  | 229.0 |          |
| Striped dolphin                 | 43.5 | 85.5  | 198.6 | 10  | 16  | 5.76 | 235.1 | 207.4 |    |    | 84.3  | 61.4  | 195.8 | 26 35    |
| White beaked dolphin            |      |       |       |     |     |      |       |       |    |    | 0.008 | 6308  | 236.0 |          |
| <i>Turtles<sup>i</sup></i>      |      |       |       |     |     |      |       |       |    |    |       |       |       |          |
| Loggerhead                      |      |       |       |     |     | 9.7  | 181.2 | 211.2 |    |    | 30.1  | 102.8 | 206.2 |          |
| Leatherback                     |      |       |       |     |     | 3.2  | 315.4 | 216.0 |    |    | 14.1  | 150.3 | 209.5 |          |
| Kemp's ridley                   |      |       |       |     |     |      |       |       |    |    | 204.6 | 39.4  | 197.9 |          |
| Hardshell (green and hawksbill) |      |       |       |     |     | 151  | 45.9  | 199.2 |    |    | 51.4  | 78.7  | 203.9 |          |

<sup>a</sup>Density models from Becker et al. (2020). Sperm whale and beaked whale models are considered not robust (E. Becker, NOAA, written pers. comm., April 12, 2020) and were not used. Southern resident killer whales, North Pacific right whales, and other species are present in the area, but not included in the density models.

<sup>b</sup>Density models from Roberts et al. (2016).

<sup>c</sup>Density models from Roberts et al. (2016).

<sup>d</sup>Maximum density in each regional model grid for each species. Where models for each month were available for the Gulf of Mexico or U.S. Atlantic margin locations, August models were used. Values for the U.S. Pacific margin (Becker et al., 2020) are reported in animals per 1 km<sup>2</sup> and were scaled to densities per 100 km<sup>2</sup>. Grid cells having values other than “no data” are 11619 (U.S. Pacific margin), 7015 (Gulf of Mexico), and 12188 (U.S. Atlantic margin).

<sup>e</sup>Threshold radius ( $R_t$ ) calculated for the maximum density, 1% probability ( $p=0.01$ ) of an animal being within the circle of radius  $R_t$  around a source, and a uniform distribution of the animals at the surface according to equation (4) in the text. Note that any received SPL value can be assigned at  $R_t$ .

<sup>f</sup>Source level for incidental take ( $SL_{it}$ ) at threshold radius  $R_t$  corresponding to received SPL of 160 dB re 1  $\mu$ Pa, the current Level B take level for marine mammals used by the U.S. National Marine Fisheries Service. 166 dB re 1  $\mu$ Pa is used in the  $SL_{it}$  calculation for sea turtles. The calculation is done with spherical spreading in this table. Spherical spreading is a valid approximation for even shallow water depths when frequencies are hundreds to thousands of Hz. Actual units for  $SL_{it}$  dB re 1  $\mu$ Pa @ 1 m. To adjust  $SL_{it}$  for  $p=0.005$  (0.5% probability), subtract 3 dB.

<sup>g</sup>90th percentile of animal densities per 100 km<sup>2</sup> for a given species. Only provided when the density exceeds 32 animals per 100 km<sup>2</sup>, which corresponds to  $R_t$  of 100 m and  $SL_{it}$  of 200 dB re 1  $\mu$ Pa @ 1 m.

<sup>h</sup>95th percentile of animal densities per 100 km<sup>2</sup> for a given species. Only provided when the density exceeds 32 animals per 100 km<sup>2</sup>, which corresponds to  $R_t$  of 100 m and  $SL_{it}$  of 200 dB re 1  $\mu$ Pa @ 1 m.

Supplementary Information for: Ruppel et al., Categorizing Active Marine Acoustic Sources Based on Their Potential to Affect Marine Animals.

<sup>i</sup>Turtle density models as reported by Geo-Marine Inc. (2007a, b, c). Densities given in animals per 1 km<sup>2</sup> scaled to animals per 100 km<sup>2</sup> for this table. The hardshell category includes green sea turtles and hawksbill turtles.

**Table S2. Modeling results for degree of exposure (Factor 5 in main text).**

| Acoustic Source                              | Source Level (dB re 1µPa@1m) | Sound Power Level (Radiated Power) dB re 10 <sup>-12</sup> W | Pulse repetition rate (s) | Vessel Speed in m/s (approximate speed in knots) | Exposure duration <sup>a</sup> at 100 m depth (s) | Ping exposure <sup>a</sup> at 100 m depth (number of pings above threshold) | Exposure duration <sup>a</sup> at 1000 m depth (s) | Ping exposure <sup>a</sup> at 1000 m depth (number of pings above threshold) |
|----------------------------------------------|------------------------------|--------------------------------------------------------------|---------------------------|--------------------------------------------------|---------------------------------------------------|-----------------------------------------------------------------------------|----------------------------------------------------|------------------------------------------------------------------------------|
| EM122, 0.5° (MBES) Single swath <sup>b</sup> | 245                          | 168                                                          | 5                         | 5 (9.7)                                          | 15                                                | 3                                                                           | 15                                                 | 3                                                                            |
| EM710, 0.5° (MBES) Single swath <sup>b</sup> | 232                          | 155                                                          | 5                         | 5 (9.7)                                          | 5                                                 | 1                                                                           | 0                                                  | 0                                                                            |
| EK60/80 (38 KHz, 7°; SBES)                   | 229                          | 150                                                          | 5                         | 5 (9.7)                                          | 15                                                | 3                                                                           | 0                                                  | 0                                                                            |
| Knudsen 3260 4x4 (hull-mounted SBP)          | 232                          | 161                                                          | 5                         | 5 (9.7)                                          | 85                                                | 17                                                                          | 105                                                | 21                                                                           |
| 3-plate boomer                               | 210 (peak)                   | 145                                                          | 1                         | 2.5 (4.9)                                        | 83                                                | 83                                                                          | 0                                                  | 0                                                                            |
| Sparker-1 (6 kJ Delta) <sup>c</sup>          | 226 (peak)                   | 169                                                          | 4                         | 2 (3.9)                                          | 1964                                              | 491                                                                         | 1692                                               | 423                                                                          |
| Sparker-2 (700 J SIG ELC 820) <sup>d</sup>   | 215 (peak)                   | 158                                                          | 4                         | 2(3.9)                                           | 548                                               | 137                                                                         | 0                                                  | 0                                                                            |
| Single Air Gun                               | 234 (peak)                   | 177                                                          | 15                        | 2 (3.9)                                          | 5010                                              | 334                                                                         | 4920                                               | 328                                                                          |

<sup>a</sup>Exposure duration and ping exposure are defined in the main text and refer to the total time (including silence between pings) for transmission of pings that are received at >160 dB re 1 µPa threshold and the number of received pings above that threshold, respectively.

<sup>b</sup>See main text for more explanation of single and dual swath MBES ping accumulation and the exposure of animals receiving pings on adjacent tracklines.

<sup>c</sup>Sparker-1 refers to a 6 kJ Delta sparker, which is normally deployed at this power level only in deeper (> 500 m) waters.

<sup>d</sup>Sparker-2 represents a more widely deployed configuration of the SIG ELC 820 sparker run at ~700 J, as is common at shallow (< 200 m) water depths.

*Supplementary Information for: Ruppel et al., Categorizing Active Marine Acoustic Sources Based on Their Potential to Affect Marine Animals.*

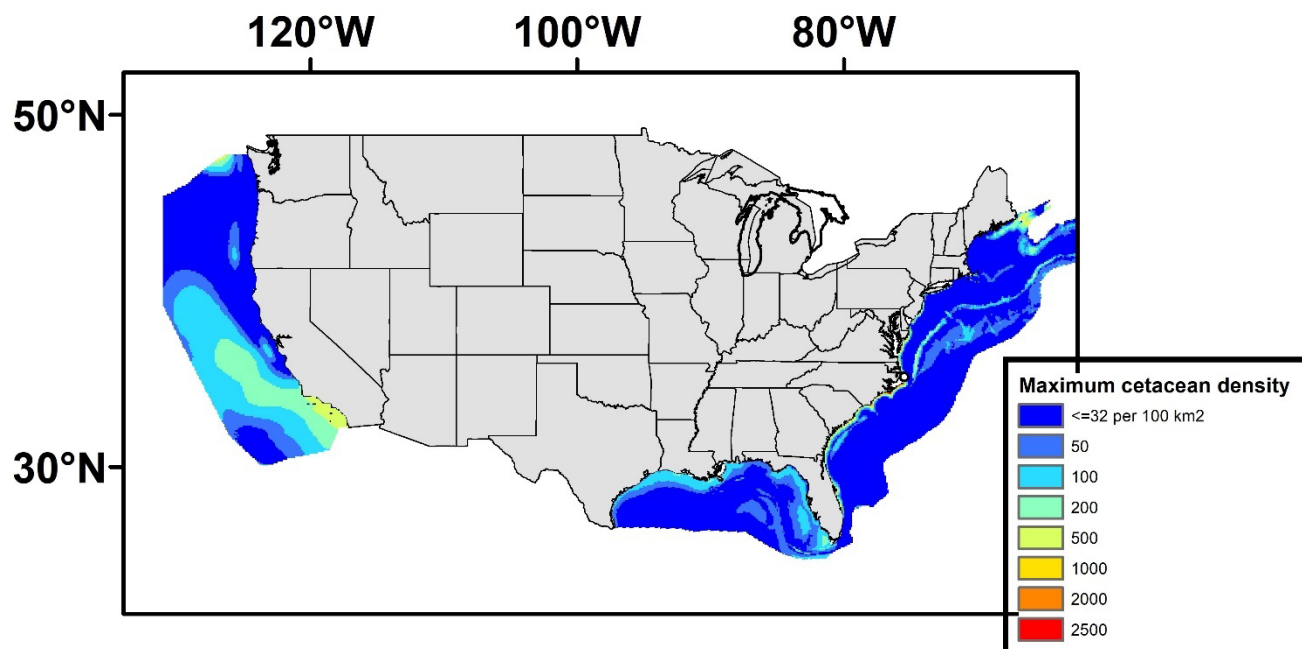

Figure S1. Maximum density of any cetacean species in each grid cell for all modeled species (Table S1) for the U.S. Pacific margin (Becker et al., 2020) and for the northern Gulf of Mexico and U.S. Atlantic margin (Roberts et al., 2016). When monthly density grids were available, the calculations were done for August.

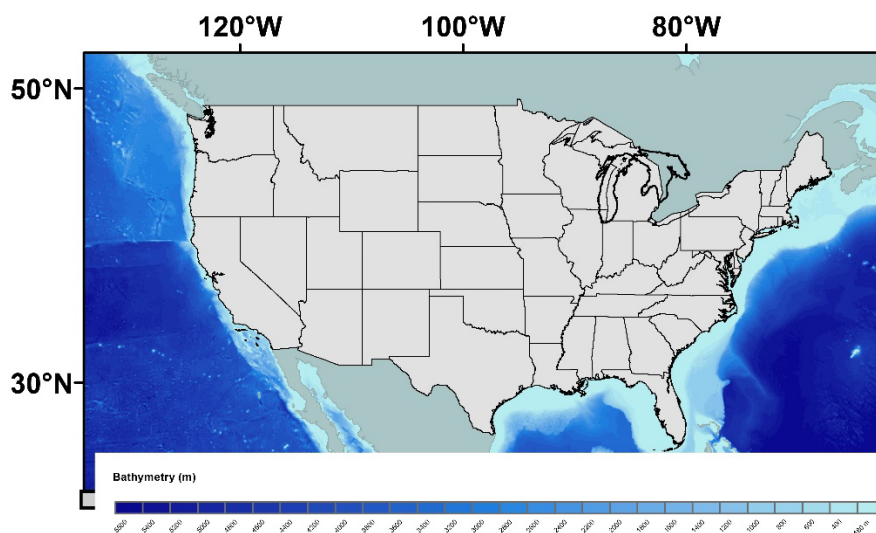

Figure S2. Bathymetry used for calculations for Factors 2 and 4, taken from 1 arc second ETOPO grid (NOAA National Geophysical Data Center, 2009).

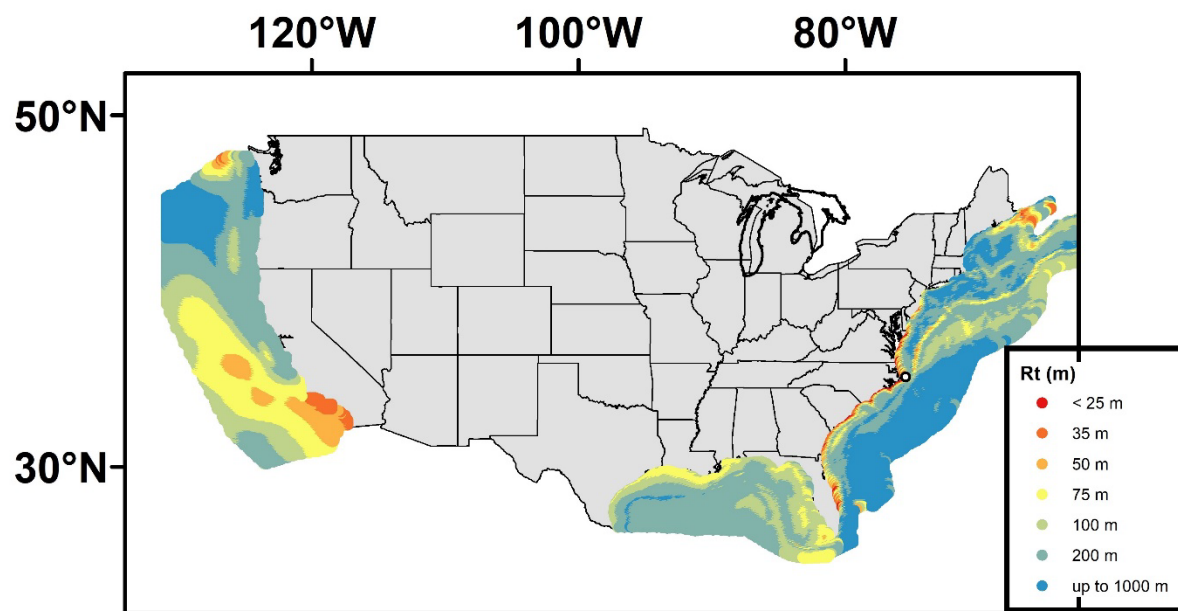

Figure S3.  $R_t$  calculated for 1% probability ( $p=0.01$ ) of a single animal being within  $R_t$  of the source, using the maximum density of any cetacean species in each grid cell and assuming a uniform distribution of animals at the surface. An arbitrary radius of 25 m around a source is currently used by NMFS, but this yields a 1% probability ( $p=0.01$ ) of an animal being within that distance of the source only immediately adjacent to the coast from Delaware to Florida on the U.S. Atlantic margin and offshore southern California on the U.S. Pacific margin. 40 m may be a more appropriate arbitrary value, but 100 m is reasonable along much of the U.S. Atlantic and Gulf of Mexico margins, including on much of the continental shelf. The corresponding  $SL_{it}$  calculated from these values is shown in Figure 7a of the main text.

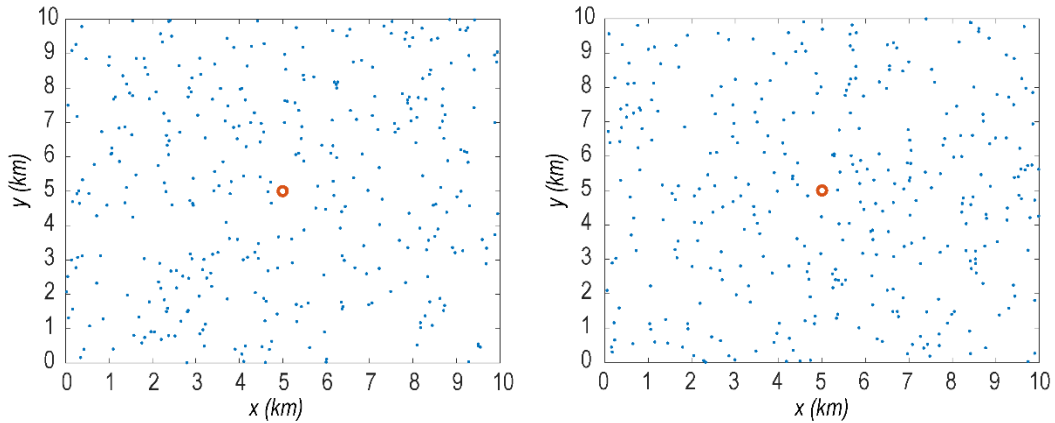

Figure S4. Two realizations of 350 random, uniformly distributed animals (blue dots) distributed in a 10 km x 10 km block at the ocean's surface.  $x$  and  $y$  coordinates are randomly chosen from a uniform distribution for  $10^5$  simulations. The red circle has  $\sim 100$  m ( $R_t = 100$  m) radius around the hypothetical source located at (5 km, 5 km). No animal is within the circle in either of these realizations. The  $p$  value for this combination of density and  $R_t$  is 0.099, meaning that there is nearly a 10% possibility that one animal would be within the red circle for any given realization. The large  $R_t$  value used here for this relatively high marine animal density is for illustrative purposes only. The calculations in the main text and in this supplement generally use  $p=0.01$  (1% probability). For a user-defined distribution of animals, even one including clustering of animals in pods, the Monte Carlo approach could be used to determine  $R_t$  empirically for a given  $p$  value.

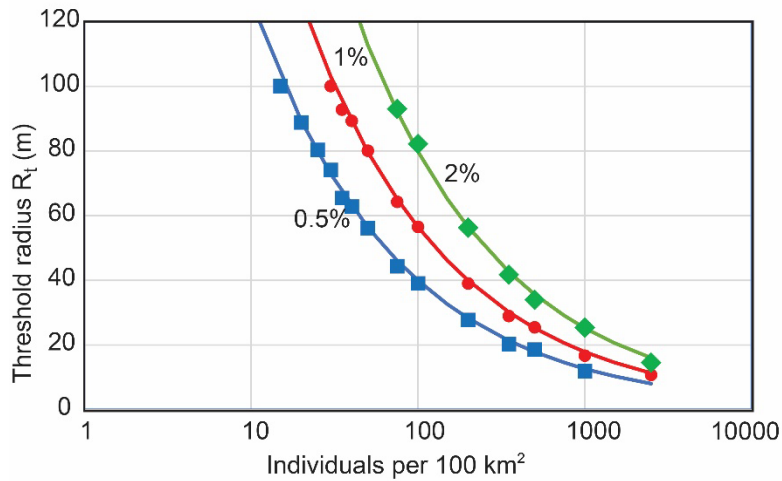

Figure S5. Comparison between empirically determined  $R_t$  values (points) using a Monte Carlo approach with the given  $p$  values and  $10^5$  realizations for each animal density, with the individual animal locations randomly and uniformly distributed on the surface of an  $100 \text{ km}^2$  block. The solid analytical curves are



calculated using Equation 4 in the main text. That equation only applies when the density distribution meets the uniform criterion.

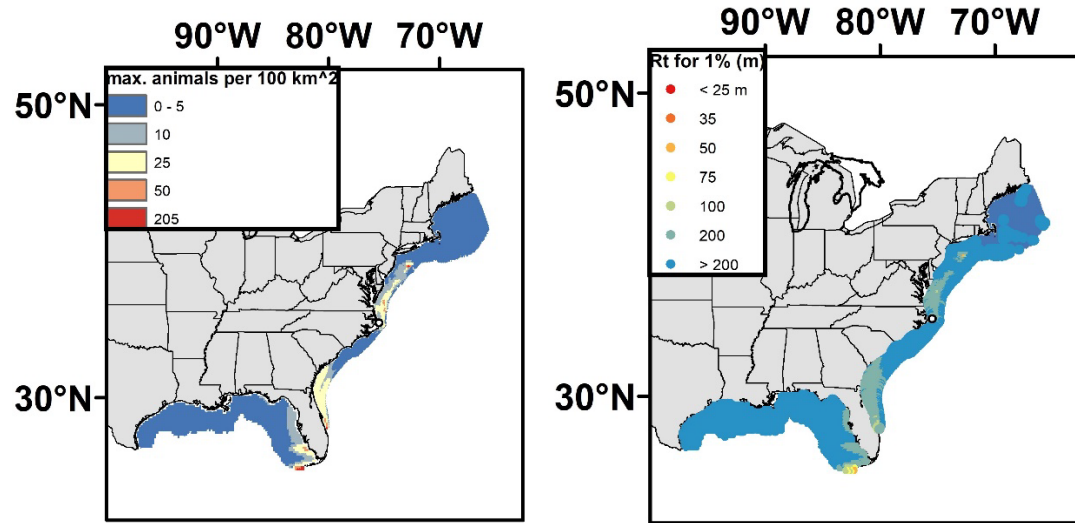

Figure S6. (Left) Maximum turtle densities scaled to animals per 100 km<sup>2</sup> for the U.S. Atlantic and northern Gulf of Mexico areas [Geo-marine, Inc., 2007a, b, c]. Note that the coverage for these models is not as extensive as for cetaceans (Figure S1). (Right)  $R_t$  calculated using the turtle maximum density distribution for  $p=0.01$  (1% probability of a single animal being within  $R_t$  of the source).

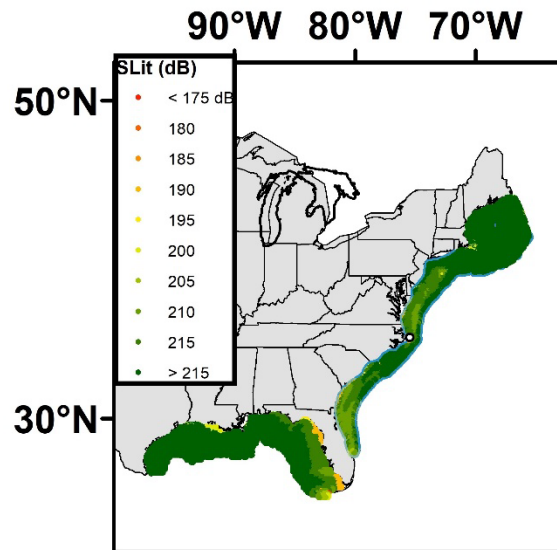

Figure S7.  $SL_{it}$  for the maximum densities of turtles, using 166 dB re 1  $\mu$ Pa as the Level B received  $SPL_B$  threshold applied at  $R_t$ . Spherical spreading assumed for water depths exceeding 10 m, and cylindrical spreading at shallower water depths. Note that  $SL_{it}$  for turtles exceeds 200 dB re 1  $\mu$ Pa @ 1 m almost everywhere except the west coast of Florida and near the Louisiana coast.

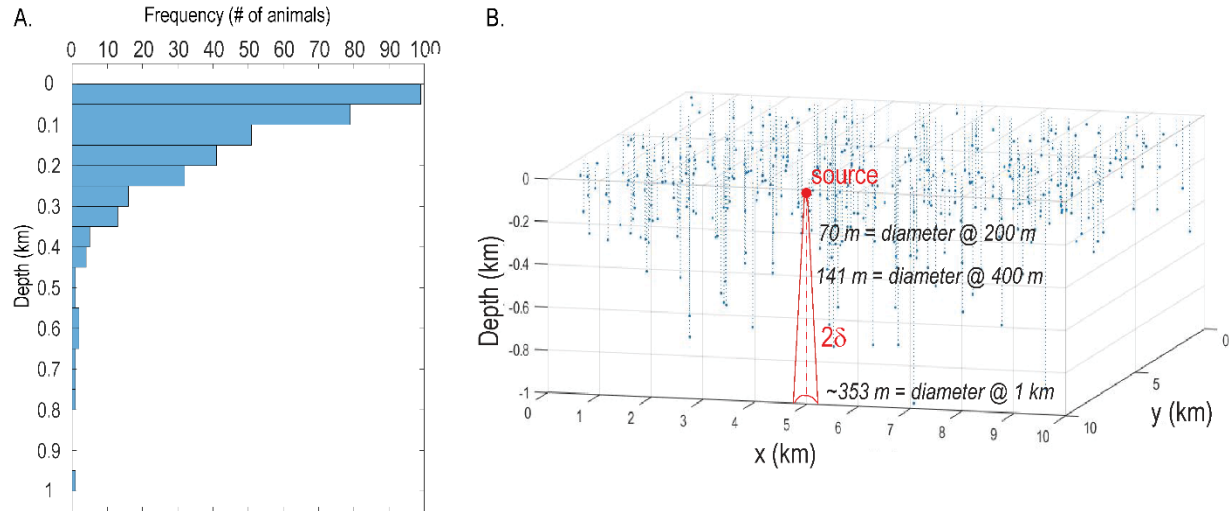

Figure S8. Configuration of animals for beamwidth limit calculations. (a) Histogram of the distribution of 350 animals as a function of depth for one of the  $10^5$  Monte Carlo realizations. Animal depth is chosen randomly from a gamma distribution. (b) Stem plot showing position of each of the 350 animals (blue dots) within the 10 km ( $x$ ) x 10 km ( $y$ ) x 1 km ( $z$ ) block for this realization. The  $x$ - $y$  positions are chosen randomly from a uniform distribution. The red cone shows a schematic ensonification cone for a surface source with  $2\delta = 20^\circ$ . For the actual Monte Carlo simulations, the source was placed at  $x$ - $y$  position (5 km, 5 km) at the surface. The ensonification cone is drawn to scale in the  $x$ -direction to highlight how small the diameter is at particularly shallow water depths.

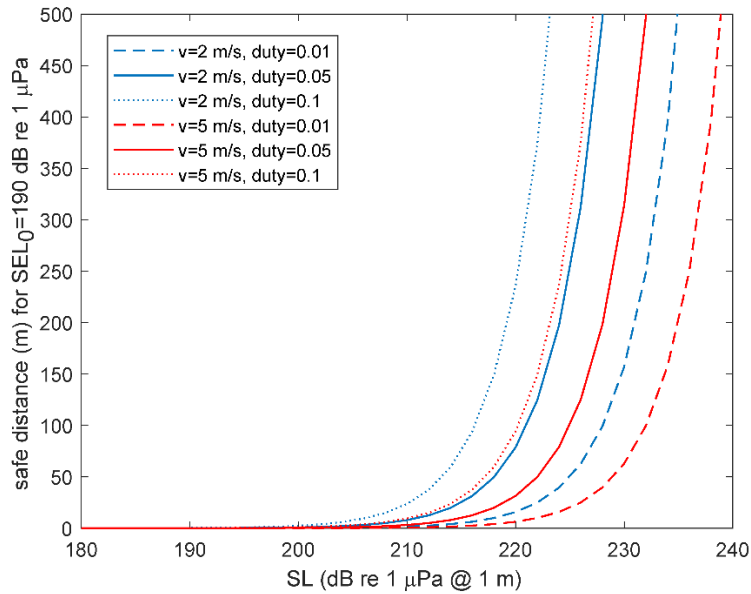

Figure S9. The impact of duty cycle (ratio of pulse length to pulse repeat rate) on safe distance as a function of SL, calculated from Equation (5), adapted from Sivle et al. (2015), with  $SEL_0$  of 190 dB re 1  $\mu$ Pa. While this result describes safe distance as applied to Level A take (NMFS-OPR-59, 2018), it illustrates dependence on pulse length, which is a factor that the degree of exposure *de minimis* criterion (Factor 5) does not include. These results are not significant for incidental take in any absolute sense, but do demonstrate how pulse length can affect metrics associated with protection of marine animals.
